# Supplementary material
Source: HighWire-hosted journal article supplement (https://bmjopen.bmj.com/content/12/7/e061149)
Supplement: inline-supplementary-material-2 [file inline-supplementary-material-2.pdf]

## APPENDIX 2

### Search Strategy

#### Chronic Kidney disease

“Kidney disease\*” OR “kidney failure” OR “Renal disease” OR “Renal insufficiency” OR “Chronic kidney” OR “Chronic renal” OR “CKD” OR “CKF” OR “CRD” OR “end-stage renal” OR “end-stage kidney” OR “end-stage renal” OR “end-stage kidney” OR “uremia” OR “uraemia” OR “dialysis” OR “hemofiltration” OR “haemofiltration” OR “hemodiafiltration” OR “haemodiafiltration” OR “hemodialysis” OR “haemodialysis” OR “renal dialysis”

#### Nature of association

“incidence” OR “prevalence” OR “occurrence” OR “diagnosis” OR “assessment” OR “identification” OR “screening” OR “progression” OR “end-stage renal”

#### Modelling and Risk scores

Ingui filter

(Validat\$ OR Predict\$.ti. OR Rule\$) OR (Predict\$ AND (Outcome\$ OR Risk\$ OR Model\$)) OR ((History OR Variable\$ OR Criteria OR Scor\$ OR Characteristic\$ OR Finding\$ OR Factor\$) AND (Predict\$ OR Model\$ OR Decision\$ OR Identif\$ OR Prognos\$)) OR (Decision\$ AND (Model\$ OR Clinical\$ OR Logistic Models/)) OR (Prognostic AND (History OR Variable\$ OR Criteria OR Scor\$ OR Characteristic\$ OR Finding\$ OR Factor\$ OR Model\$))

Haynes Broad filter

(Predict\*[tiab] OR Predictive value of tests[mh] OR Scor\*[tiab] OR Observ\*[tiab] OR Observer variation[mh])
